# Supplementary material for: ACLP Activates Cancer-Associated Fibroblasts and Inhibits CD8+ T-Cell Infiltration in Oral Squamous Cell Carcinoma
Source: MDPI journal article supplement (doi:10.3390/cancers15174303), 2023-08-28
Supplement: s1 [file s1]

Figure S1

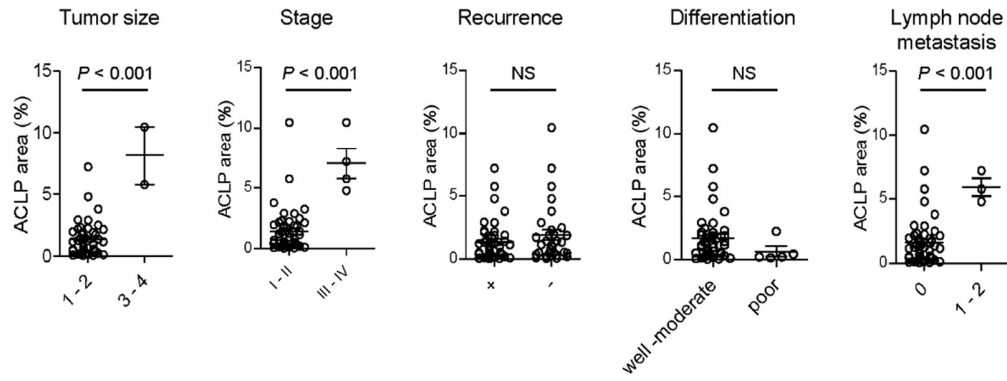

**Figure S1**

Correlations between the extent of ACLP-positive areas and clinicopathological characteristics in an independent set of primary OSCCs (n = 49).

Figure S2

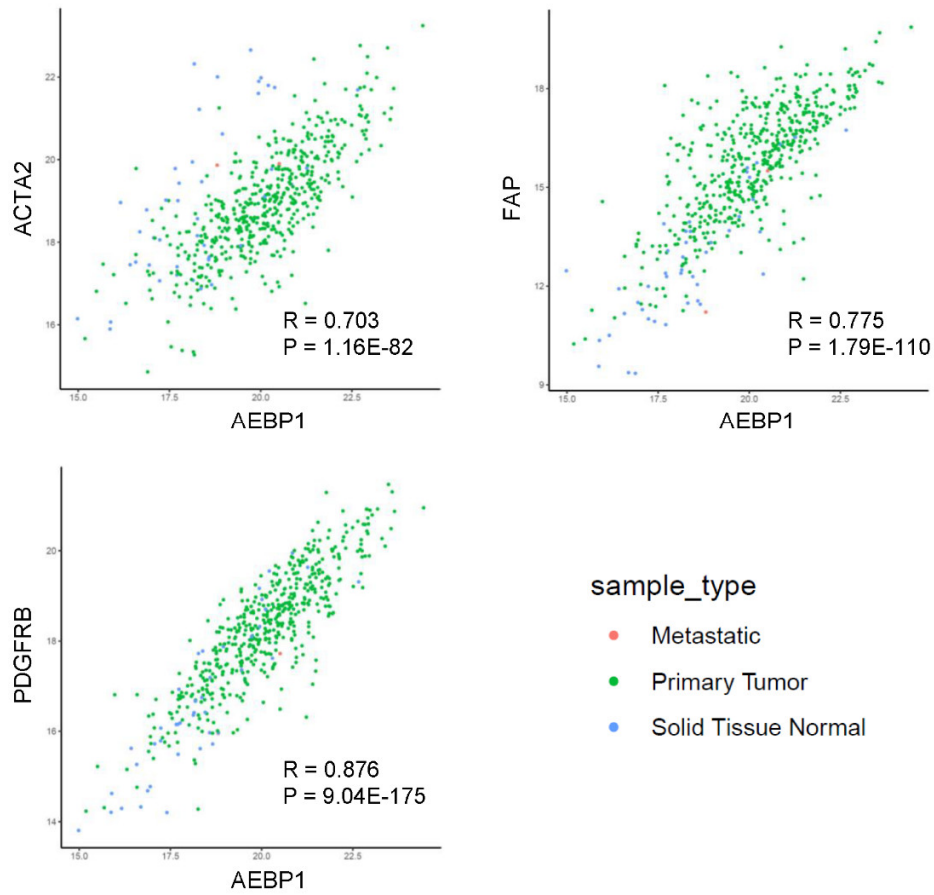

**Figure S2**

Correlations between the mRNA expression levels of CAF markers (*ACTA2*, *FAP* and *PDGFRB*) and those of *AEBP1* in primary HNSCCs in a dataset from The Cancer Genome Atlas (TCGA).

Figure S3

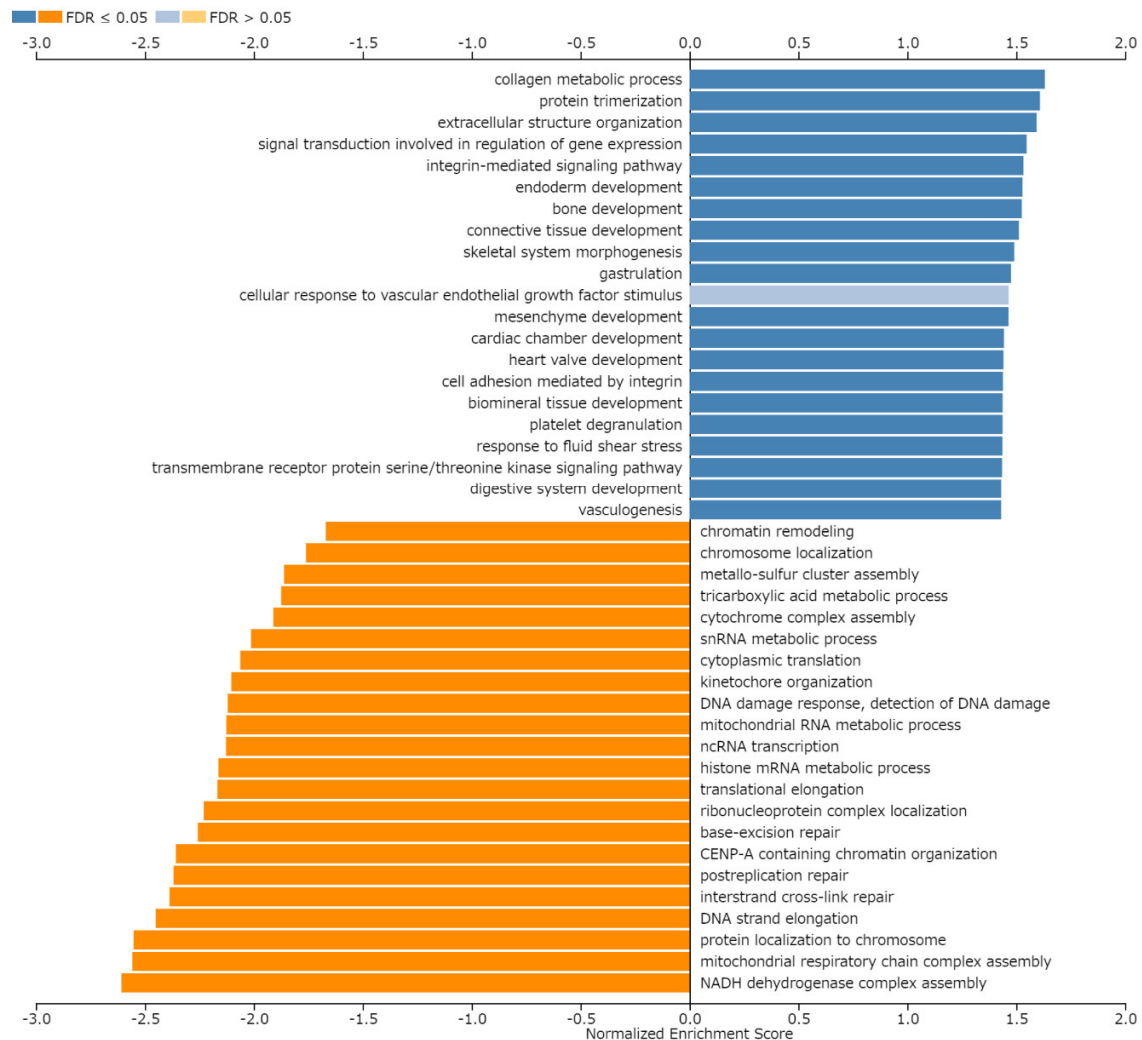

Figure S3

Gene Ontology analysis of genes correlated positively (upper) or negatively (lower) with *AEBP1* using RNA-seq data obtained from primary HNSCCs in a dataset from The Cancer Genome Atlas (TCGA). The analysis was performed using LinkedOmics (<http://linkedomics.org>).

Figure S4

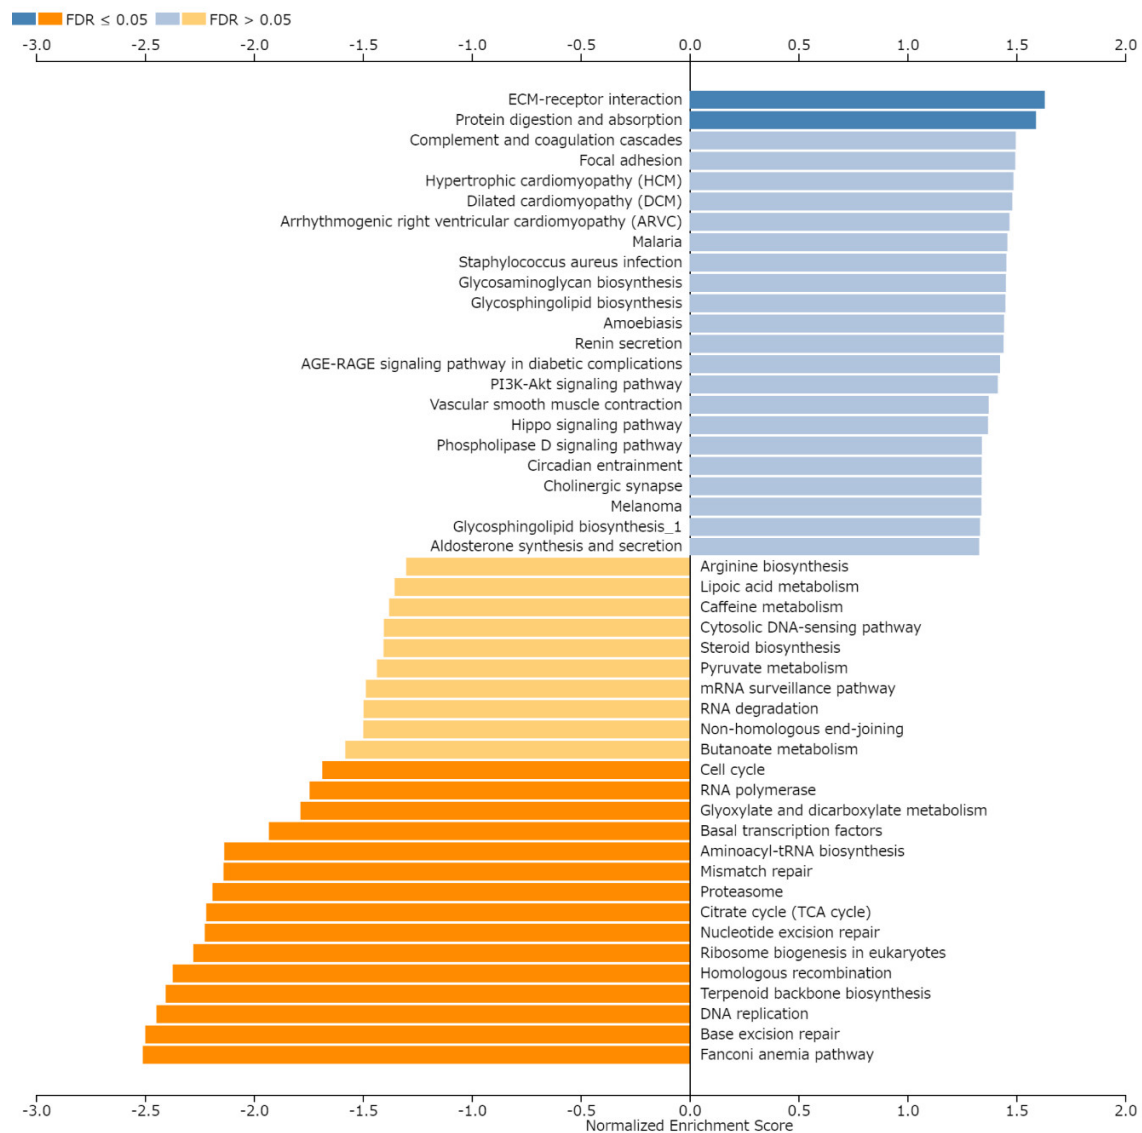

Figure S4

KEGG pathway analysis of genes correlated positively (upper) or negatively (lower) with *AEBP1* using RNA-seq data obtained from primary HNSCCs in a dataset from The Cancer Genome Atlas (TCGA). The analysis was performed using LinkedOmics (<http://linkedomics.org>).

Figure S5

Figure 2 (F)

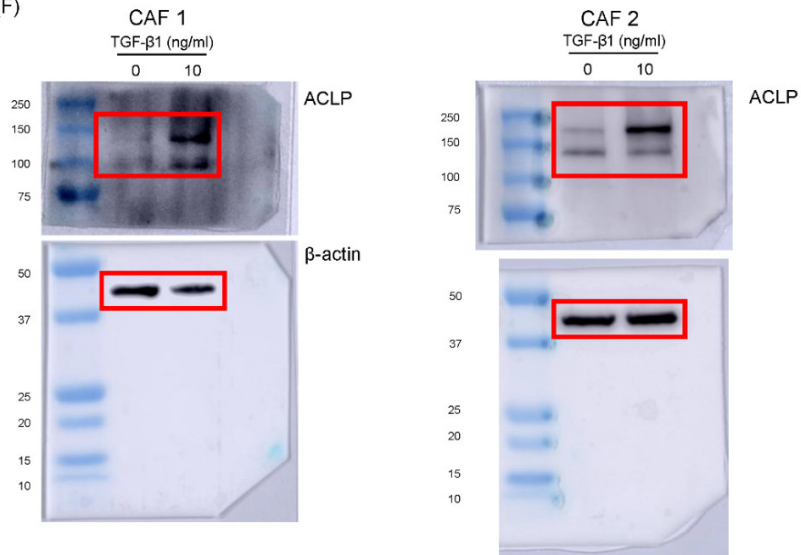

Figure 3 (B)

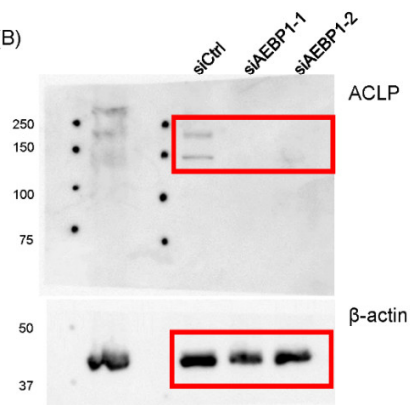

Figure 4 (C)

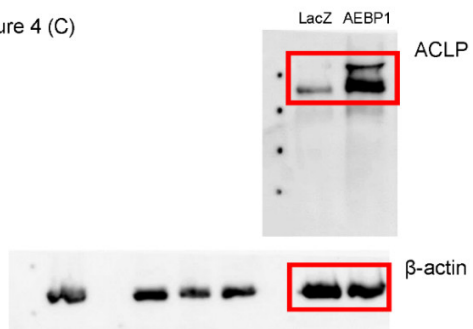

Figure S5

Original images of the western blot analysis.

Figure S6

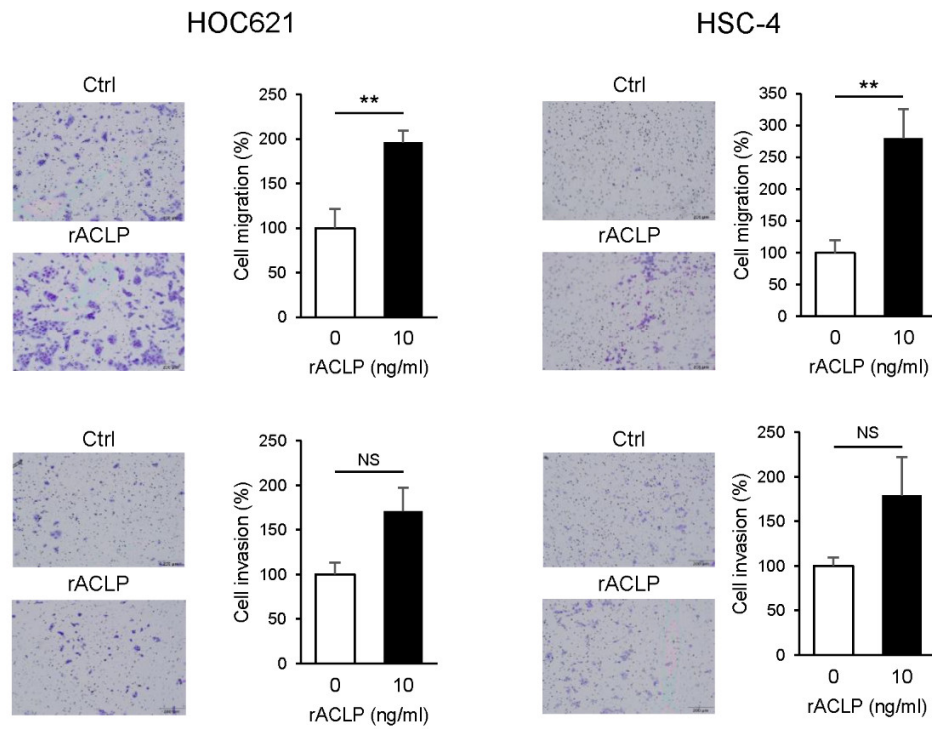

**Figure S6**

Transwell migration assays using the indicated OSCC cells treated with or without recombinant ACLP. Representative results are shown on the left; summarized results are on the right. (n = 3). Error bars represent SEMs. \*\* $P < 0.01$ .

Figure S7

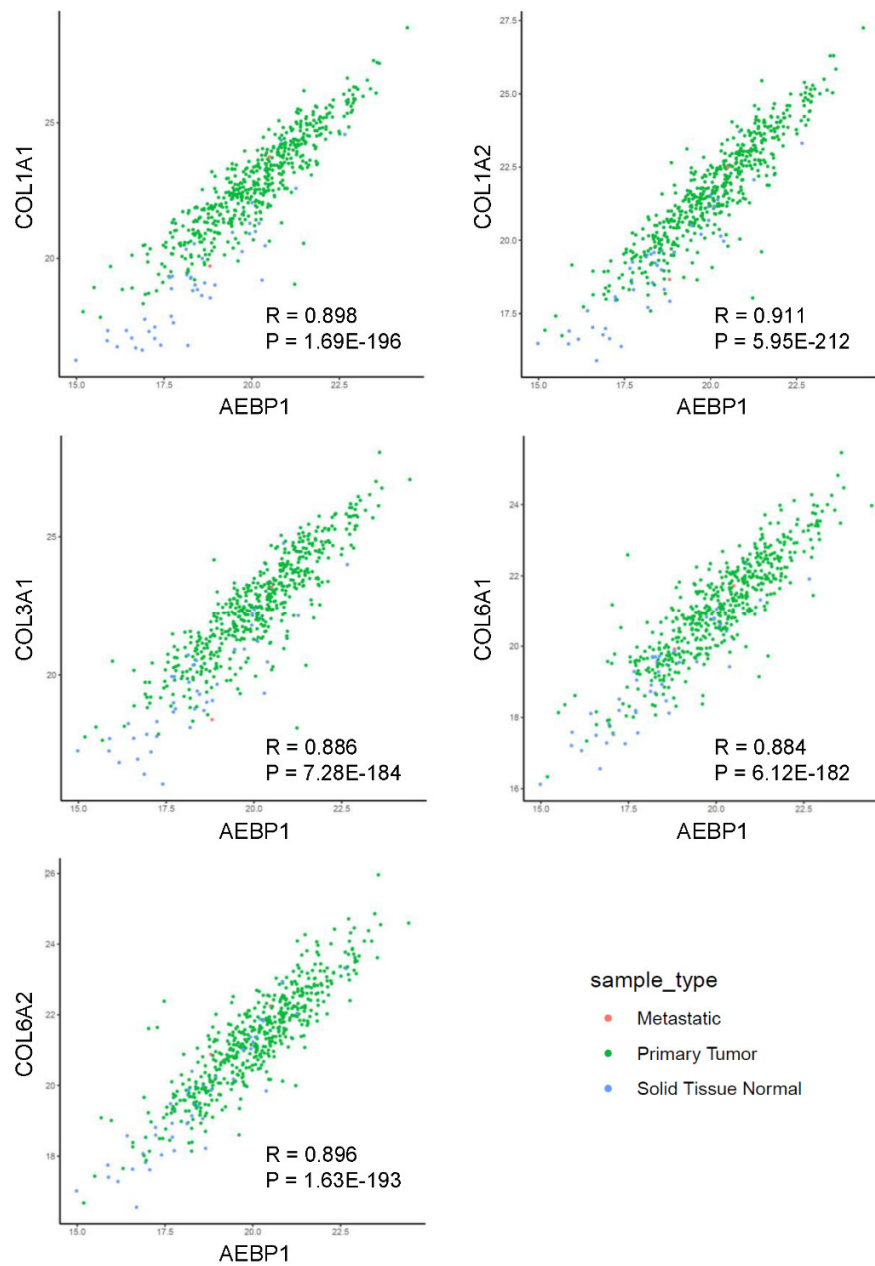

Figure S7

Correlations between mRNA expression levels of the indicated collagen family genes and those of *AEBP1* in primary HNSCCs in a dataset from The Cancer Genome Atlas (TCGA).



Figure S8

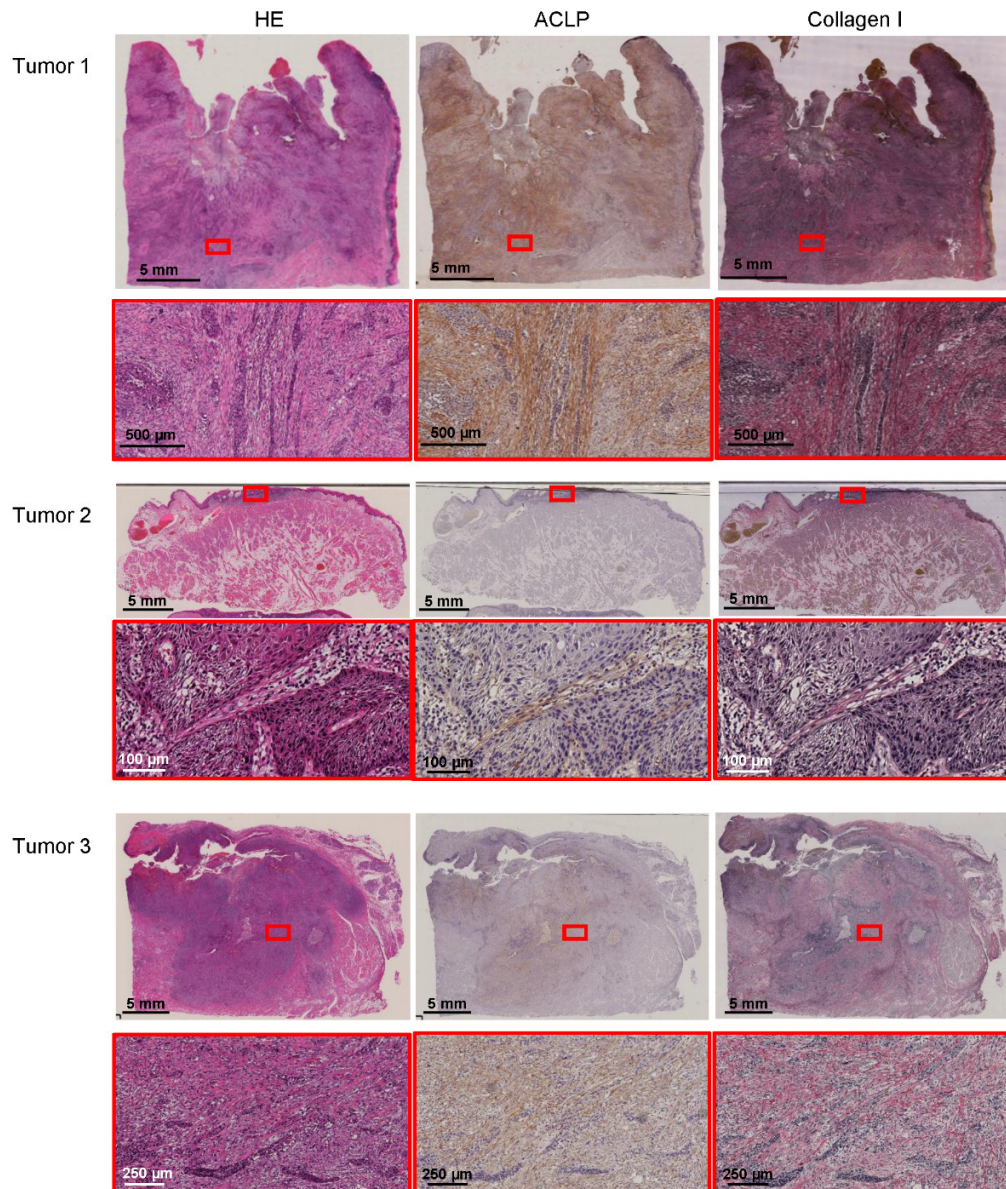

**Figure S8**

Immunohistochemical staining of ACLP and collagen I in three representative OSCC tissue samples. Magnified views of boxed areas are shown below.



Figure S9

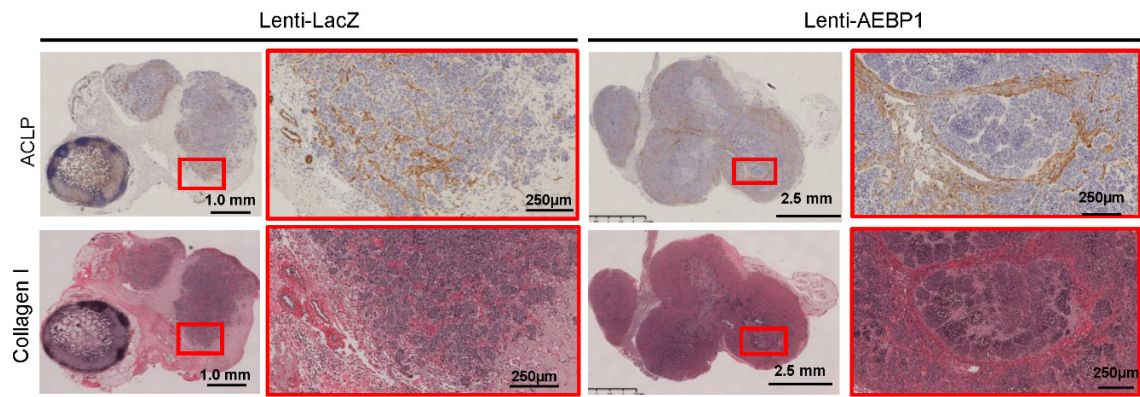

**Figure S9**

Immunohistochemical staining of ACLP and collagen I in representative xenograft tumors in Figure 5. Mice were transplanted with SAS cells and CAFs (CAF1) infected with the indicated lentiviral vectors.

Figure S10

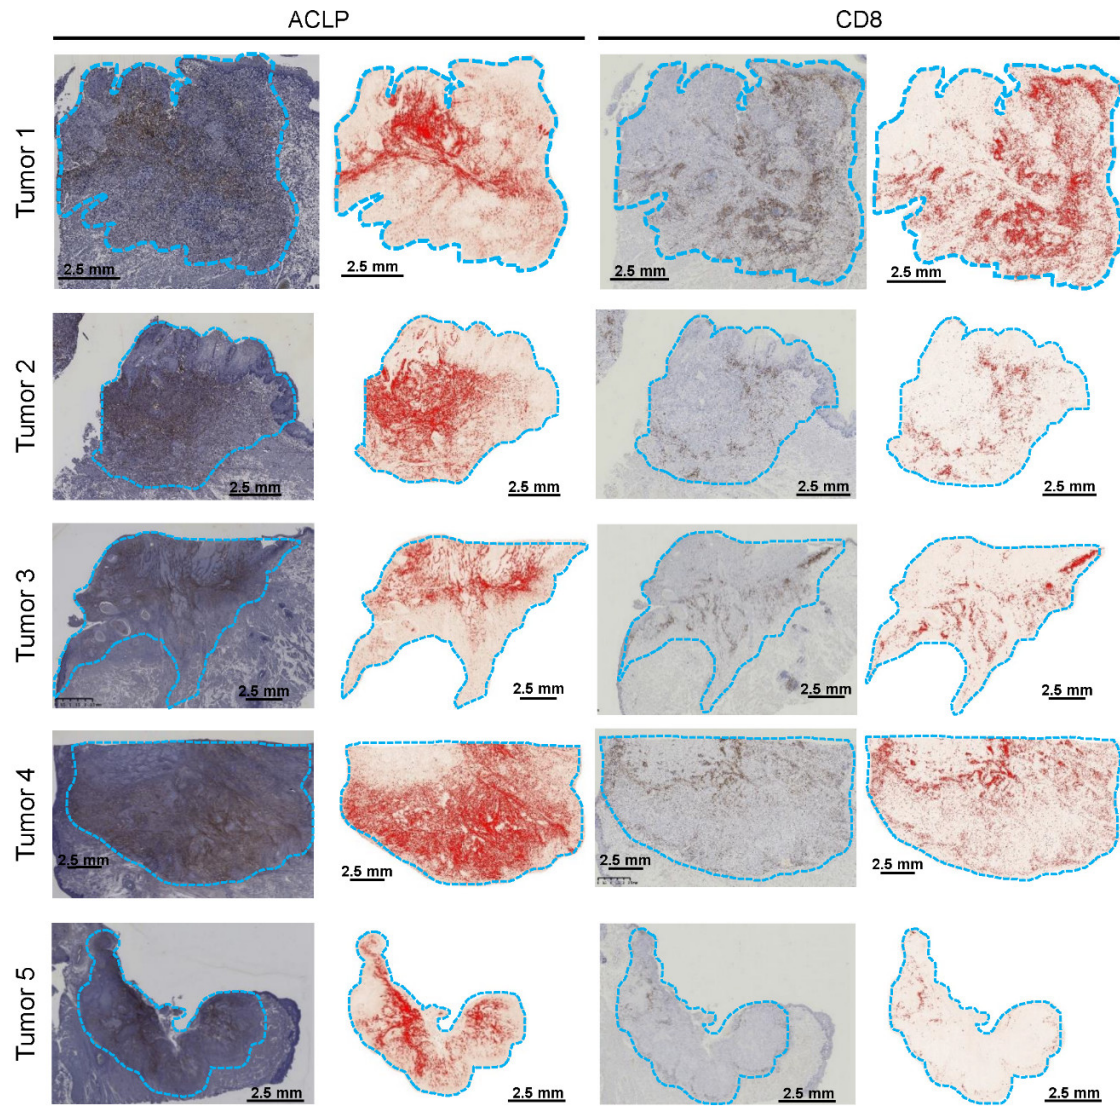

**Figure S10**

Immunohistochemical staining of ACLP and CD8 in representative OSCC tissues. Blue lines indicate tumor areas, including invasive front regions. Areas positive for ACLP and CD8 are shown on the right.

Table S1. Clinicopathological features of the patients enrolled in this study

|                              |               | Training set<br>(n = 49) | Validation set<br>(n = 49) |
|------------------------------|---------------|--------------------------|----------------------------|
| Age (y, mean $\pm$ SD)       |               | 64.14 $\pm$ 10.6         | 65.29 $\pm$ 14.2           |
| Gender                       | M             | 37                       | 31                         |
|                              | F             | 12                       | 18                         |
| Tumor size (n, %)            | T1, T2        | 29                       | 47                         |
|                              | T3, T4        | 20                       | 2                          |
| Lymph node metastasis (n, %) | +             | 11                       | 3                          |
|                              | -             | 38                       | 46                         |
| Stage (n, %)                 | I, II         | 32                       | 45                         |
|                              | III, IV       | 17                       | 4                          |
| Differentiation (n, %)       | Well-moderate | 24                       | 44                         |
|                              | Poor          | 25                       | 5                          |
| Recurrence (n, %)            | +             | 20                       | 18                         |
|                              | -             | 29                       | 31                         |

Table S2. Sequences of the primers used in this study

|                 |                          |                               |
|-----------------|--------------------------|-------------------------------|
| RT-PCR          |                          |                               |
| AEBP1           | Forward                  | 5'-TCTTCGTGGGCTTCAGCAATGA-3'  |
|                 | Reverse                  | 5'-TAGATGCGGATGAAACGAGCCA-3'  |
|                 | Product size (variant 1) | 148 bp                        |
|                 | Product size (variant 2) | 251 bp                        |
| qRT-PCR         |                          |                               |
| AEBP1 variant 1 | Forward                  | 5'-CATTCTGGCTCCCTCAGAAA-3'    |
|                 | Reverse                  | 5'-TCTCCTGGATTCTGCCAGTTA-3'   |
|                 | Product size             | 120 bp                        |
| CDKN1A          | Forward                  | 5'-AGACTCTCAGGGTCGAAAACG-3'   |
|                 | Reverse                  | 5'-TTAGGGCTTCCTCTTGGAGAAG-3'  |
|                 | Product size             | 91 bp                         |
| VIM             | Forward                  | 5'-TGACCTTGAACGCAAAGTGG-3'    |
|                 | Reverse                  | 5'-TCAGGCTTGGAACATCCAC-3'     |
|                 | Product size             | 138 bp                        |
| TWIST           | Forward                  | 5'-CCTTCTCGGTCTGGAGGATG-3'    |
|                 | Reverse                  | 5'-CTGTCCATTTTCTCCTTCTCTGG-3' |
|                 | Product size             | 130 bp                        |
| CDH1            | Forward                  | 5'-TTTGACGCCGAGAGCTACAC-3'    |
|                 | Reverse                  | 5'-TCTGTGCCCACTTTGAATCG-3'    |
|                 | Product size             | 146 bp                        |
| CDH2            | Forward                  | 5'-AAGTGGCAGTAAAATTGAGCC-3'   |
|                 | Reverse                  | 5'-GTGCTTACTGAATTGTCTTGG-3'   |
|                 | Product size             | 104 bp                        |
| ACTB            | Forward                  | 5'-GCCAACCGCGAGAAGATGA-3'     |
|                 | Reverse                  | 5'-AGCACAGCCTGGATAGCAAC-3'    |
|                 | Product size             | 80 bp                         |

Table S3. ACLP expression and clinicopathological features of primary OSCC

|                              |                | ACLP-low<br>(n = 24) | ACLP-high<br>(n = 25) | P     |
|------------------------------|----------------|----------------------|-----------------------|-------|
| Age (mean±SD)                |                | 64.9±10.3            | 63.4±10.9             | NS    |
| Gender (n, %)                | Male           | 19 (79)              | 18 (72)               | NS    |
|                              | Female         | 5 (21)               | 7 (28)                |       |
| Tumor size (n, %)            | T1, T2         | 18 (75)              | 11 (44)               | <0.05 |
|                              | T3, T4         | 6 (25)               | 14 (56)               |       |
| Lymph node metastasis (n, %) | +              | 3 (13)               | 8 (32)                | NS    |
|                              | -              | 21 (87)              | 17 (68)               |       |
| Stage (n, %)                 | I, II          | 18 (75)              | 14 (56)               | NS    |
|                              | III, IV        | 6 (25)               | 11 (44)               |       |
| Differentiation (n, %)       | Well, moderate | 24 (100)             | 17 (68)               | <0.05 |
|                              | Poor           | 0 (0)                | 8 (32)                |       |
| Mode of invasion             | YK-2, 3        | 21 (88)              | 12 (48)               | <0.01 |
|                              | YK-4C, 4D      | 3 (12)               | 13 (52)               |       |
| Recurrence (n, %)            | +              | 7 (29)               | 13 (52)               | NS    |
|                              | -              | 17 (71)              | 12 (48)               |       |

Table S4. Top 500 genes co-expressed with AEBP1 in primary HNSCC in TCGA dataset

| Gene     | R      | P         |
|----------|--------|-----------|
| COL1A2   | 0.9114 | 5.95E-212 |
| EMILIN1  | 0.9004 | 8.03E-199 |
| COL1A1   | 0.8984 | 1.69E-196 |
| COL6A2   | 0.8956 | 1.63E-193 |
| COL3A1   | 0.8862 | 7.28E-184 |
| COL6A1   | 0.8842 | 6.12E-182 |
| OLFML2B  | 0.8820 | 6.29E-180 |
| COL6A3   | 0.8786 | 8.80E-177 |
| PDGFRB   | 0.8764 | 9.04E-175 |
| ADAMTS2  | 0.8749 | 2.05E-173 |
| PCOLCE   | 0.8673 | 5.80E-167 |
| SCARF2   | 0.8651 | 3.62E-165 |
| ITGA11   | 0.8647 | 8.02E-165 |
| SPARC    | 0.8644 | 1.40E-164 |
| TIMP2    | 0.8612 | 5.30E-162 |
| THY1     | 0.8597 | 7.91E-161 |
| COL5A1   | 0.8543 | 1.04E-156 |
| MMP2     | 0.8538 | 2.58E-156 |
| VCAN     | 0.8531 | 7.41E-156 |
| ADAMTS12 | 0.8529 | 1.13E-155 |
| BGN      | 0.8523 | 3.33E-155 |
| MXRA8    | 0.8514 | 1.50E-154 |
| LAMA4    | 0.8495 | 3.60E-153 |
| NOX4     | 0.8486 | 1.63E-152 |
| CTSK     | 0.8467 | 3.36E-151 |
| POSTN    | 0.8452 | 3.58E-150 |
| LRRC15   | 0.8421 | 5.78E-148 |
| COL5A2   | 0.8400 | 1.44E-146 |
| GLT8D2   | 0.8371 | 1.26E-144 |
| BICC1    | 0.8318 | 3.48E-141 |
| GGT5     | 0.8258 | 2.11E-137 |
| ZNF469   | 0.8185 | 4.99E-133 |
| COL8A1   | 0.8153 | 3.35E-131 |
| CPXM1    | 0.8150 | 5.05E-131 |
| HTRA3    | 0.8145 | 9.53E-131 |
| P4HA3    | 0.8140 | 1.93E-130 |
| ISLR     | 0.8119 | 3.01E-129 |



|          |        |           |
|----------|--------|-----------|
| KCNE4    | 0.8047 | 2.76E-125 |
| FBN1     | 0.8045 | 3.36E-125 |
| SGIP1    | 0.8041 | 5.62E-125 |
| FN1      | 0.8039 | 7.59E-125 |
| ASPN     | 0.8026 | 3.50E-124 |
| KIAA1462 | 0.8003 | 6.13E-123 |
| HEYL     | 0.7999 | 9.86E-123 |
| SULF1    | 0.7993 | 1.96E-122 |
| FSTL1    | 0.7988 | 3.66E-122 |
| HEPH     | 0.7987 | 4.17E-122 |
| CDH11    | 0.7967 | 4.42E-121 |
| HHIPL1   | 0.7925 | 6.33E-119 |
| RCN3     | 0.7924 | 7.38E-119 |
| ADAM12   | 0.7911 | 3.12E-118 |
| NTM      | 0.7904 | 7.05E-118 |
| FAM198B  | 0.7904 | 7.60E-118 |
| FNDC1    | 0.7893 | 2.46E-117 |
| COL10A1  | 0.7889 | 3.80E-117 |
| SFRP2    | 0.7872 | 2.64E-116 |
| TGFB3    | 0.7872 | 2.80E-116 |
| OLFML3   | 0.7860 | 1.03E-115 |
| CTHRC1   | 0.7858 | 1.32E-115 |
| COL11A1  | 0.7850 | 3.23E-115 |
| CACNA1C  | 0.7827 | 4.11E-114 |
| DACT1    | 0.7823 | 6.04E-114 |
| RASGRF2  | 0.7815 | 1.53E-113 |
| EFEMP2   | 0.7792 | 1.78E-112 |
| CRISPLD2 | 0.7761 | 5.05E-111 |
| FAP      | 0.7749 | 1.79E-110 |
| THBS2    | 0.7738 | 5.87E-110 |
| TMEM119  | 0.7735 | 8.16E-110 |
| LRRC32   | 0.7734 | 9.14E-110 |
| OLFML1   | 0.7707 | 1.55E-108 |
| HIC1     | 0.7691 | 7.83E-108 |
| ADAMTS7  | 0.7677 | 3.13E-107 |
| SSC5D    | 0.7631 | 3.45E-105 |
| CHRD     | 0.7618 | 1.17E-104 |
| FBLN2    | 0.7598 | 8.44E-104 |
| MMP11    | 0.7502 | 8.21E-100 |
| TAGLN    | 0.7501 | 8.97E-100 |

|          |        |          |
|----------|--------|----------|
| PPAPDC1A | 0.7469 | 1.84E-98 |
| ITGA1    | 0.7468 | 1.98E-98 |
| CMTM3    | 0.7435 | 4.14E-97 |
| SYDE1    | 0.7405 | 5.80E-96 |
| CD248    | 0.7385 | 3.41E-95 |
| DACT3    | 0.7369 | 1.44E-94 |
| TNFAIP6  | 0.7365 | 2.12E-94 |
| FAM26E   | 0.7349 | 8.56E-94 |
| NID2     | 0.7344 | 1.26E-93 |
| LUM      | 0.7342 | 1.49E-93 |
| MYL9     | 0.7338 | 2.21E-93 |
| PMP22    | 0.7308 | 2.95E-92 |
| ECM2     | 0.7305 | 3.74E-92 |
| ZNF521   | 0.7301 | 5.04E-92 |
| KIF26B   | 0.7297 | 7.29E-92 |
| GPR124   | 0.7295 | 8.36E-92 |
| MXRA5    | 0.7293 | 1.02E-91 |
| GPC6     | 0.7293 | 1.04E-91 |
| CALD1    | 0.7287 | 1.74E-91 |
| DDR2     | 0.7284 | 2.20E-91 |
| LOXL2    | 0.7279 | 3.47E-91 |
| SDC2     | 0.7262 | 1.41E-90 |
| KCNJ8    | 0.7257 | 2.03E-90 |
| COL12A1  | 0.7251 | 3.47E-90 |
| TMEM204  | 0.7248 | 4.30E-90 |
| GREM1    | 0.7247 | 4.86E-90 |
| RARRES2  | 0.7231 | 1.85E-89 |
| PXDN     | 0.7225 | 3.07E-89 |
| PCDH12   | 0.7220 | 4.37E-89 |
| FMOD     | 0.7219 | 4.78E-89 |
| COL18A1  | 0.7218 | 5.43E-89 |
| WISP1    | 0.7216 | 6.41E-89 |
| CLEC11A  | 0.7204 | 1.65E-88 |
| P3H1     | 0.7190 | 5.12E-88 |
| PRRX1    | 0.7188 | 6.32E-88 |
| CERCAM   | 0.7178 | 1.44E-87 |
| COL5A3   | 0.7175 | 1.81E-87 |
| ST3GAL2  | 0.7171 | 2.41E-87 |
| MMP16    | 0.7164 | 4.37E-87 |
| FIBIN    | 0.7161 | 5.27E-87 |

|               |        |          |
|---------------|--------|----------|
| NFATC4        | 0.7158 | 7.14E-87 |
| WDR86         | 0.7156 | 7.86E-87 |
| KIAA1755      | 0.7153 | 1.07E-86 |
| RP11-426C22.4 | 0.7141 | 2.72E-86 |
| COLEC12       | 0.7139 | 3.16E-86 |
| PDE3A         | 0.7139 | 3.16E-86 |
| ADAMTSL2      | 0.7117 | 1.72E-85 |
| PLXDC1        | 0.7113 | 2.42E-85 |
| PLXND1        | 0.7105 | 4.42E-85 |
| MEIS3         | 0.7105 | 4.51E-85 |
| CYS1          | 0.7098 | 7.66E-85 |
| RAB3IL1       | 0.7092 | 1.22E-84 |
| TGFB1I1       | 0.7087 | 1.80E-84 |
| COL4A2        | 0.7054 | 2.41E-83 |
| WNT2          | 0.7050 | 3.09E-83 |
| ANGPTL2       | 0.7041 | 6.55E-83 |
| ACTA2         | 0.7033 | 1.16E-82 |
| DCHS1         | 0.7030 | 1.45E-82 |
| FKBP10        | 0.7024 | 2.30E-82 |
| ADAMTS10      | 0.6983 | 5.00E-81 |
| CHN1          | 0.6980 | 6.37E-81 |
| SFRP4         | 0.6976 | 8.50E-81 |
| MRGPRF        | 0.6974 | 9.44E-81 |
| FKBP7         | 0.6962 | 2.32E-80 |
| GUCY1A2       | 0.6944 | 8.78E-80 |
| IGFBP7        | 0.6943 | 9.74E-80 |
| TWIST1        | 0.6931 | 2.24E-79 |
| DAB2          | 0.6918 | 5.93E-79 |
| CSMD2         | 0.6911 | 9.45E-79 |
| ANTXR1        | 0.6903 | 1.74E-78 |
| FAM19A5       | 0.6891 | 3.96E-78 |
| ATP10A        | 0.6886 | 5.66E-78 |
| MMP14         | 0.6874 | 1.33E-77 |
| LOXL1         | 0.6867 | 2.31E-77 |
| ADAMTS14      | 0.6864 | 2.70E-77 |
| COL4A1        | 0.6855 | 5.31E-77 |
| PDGFRL        | 0.6849 | 7.90E-77 |
| CHSY3         | 0.6831 | 2.80E-76 |
| LOXL3         | 0.6829 | 3.19E-76 |
| ANPEP         | 0.6816 | 7.96E-76 |

|               |        |          |
|---------------|--------|----------|
| LAMP5         | 0.6813 | 1.01E-75 |
| GIPC3         | 0.6806 | 1.55E-75 |
| ENPP1         | 0.6805 | 1.76E-75 |
| SPON1         | 0.6801 | 2.19E-75 |
| ZEB2          | 0.6792 | 4.26E-75 |
| FAM101A       | 0.6792 | 4.26E-75 |
| CNRIP1        | 0.6784 | 7.50E-75 |
| LRRC17        | 0.6783 | 7.64E-75 |
| STARD13       | 0.6782 | 8.36E-75 |
| PTH1R         | 0.6781 | 9.13E-75 |
| ADAMTS4       | 0.6779 | 1.04E-74 |
| MRC2          | 0.6775 | 1.31E-74 |
| UNC5C         | 0.6770 | 1.95E-74 |
| LHFP          | 0.6756 | 4.77E-74 |
| COL24A1       | 0.6754 | 5.51E-74 |
| AMPH          | 0.6749 | 8.15E-74 |
| ADAMTS5       | 0.6743 | 1.15E-73 |
| JAM3          | 0.6738 | 1.63E-73 |
| SYNDIG1       | 0.6733 | 2.37E-73 |
| RP11-588K22.2 | 0.6729 | 2.94E-73 |
| RP11-863P13.3 | 0.6710 | 1.08E-72 |
| VIM           | 0.6707 | 1.28E-72 |
| GUCY1A3       | 0.6706 | 1.37E-72 |
| GPR4          | 0.6701 | 1.92E-72 |
| P3H3          | 0.6690 | 4.15E-72 |
| NREP          | 0.6688 | 4.78E-72 |
| TBXA2R        | 0.6679 | 8.40E-72 |
| GPX8          | 0.6665 | 2.14E-71 |
| ENG           | 0.6650 | 5.45E-71 |
| NID1          | 0.6649 | 5.85E-71 |
| FBLN5         | 0.6640 | 1.06E-70 |
| CTD-2171N6.1  | 0.6636 | 1.37E-70 |
| HSPA12B       | 0.6635 | 1.52E-70 |
| RGS4          | 0.6627 | 2.43E-70 |
| AK5           | 0.6613 | 6.18E-70 |
| C1QTNF6       | 0.6606 | 9.77E-70 |
| TM6SF2        | 0.6600 | 1.43E-69 |
| F2R           | 0.6592 | 2.31E-69 |
| GALNT15       | 0.6592 | 2.33E-69 |
| ACVRL1        | 0.6591 | 2.50E-69 |

|               |        |          |
|---------------|--------|----------|
| HLX           | 0.6586 | 3.43E-69 |
| MMP19         | 0.6577 | 6.03E-69 |
| DCN           | 0.6569 | 1.02E-68 |
| DLC1          | 0.6560 | 1.77E-68 |
| SAMD14        | 0.6560 | 1.77E-68 |
| PMEPA1        | 0.6556 | 2.33E-68 |
| HTRA1         | 0.6548 | 3.80E-68 |
| NEGR1         | 0.6545 | 4.50E-68 |
| VSTM4         | 0.6544 | 4.83E-68 |
| PHLDB1        | 0.6541 | 5.78E-68 |
| ZCCHC24       | 0.6539 | 6.36E-68 |
| IGF2          | 0.6522 | 1.89E-67 |
| CLIP3         | 0.6520 | 2.14E-67 |
| GAS1          | 0.6511 | 3.63E-67 |
| SOX11         | 0.6509 | 4.27E-67 |
| FMNL3         | 0.6505 | 5.39E-67 |
| LTBP2         | 0.6499 | 7.88E-67 |
| NTNG2         | 0.6498 | 8.07E-67 |
| CACNA1H       | 0.6480 | 2.42E-66 |
| DNM3OS        | 0.6476 | 3.09E-66 |
| MAGEL2        | 0.6465 | 5.97E-66 |
| EBF1          | 0.6460 | 8.23E-66 |
| BNC2          | 0.6459 | 8.73E-66 |
| LAMB1         | 0.6446 | 1.92E-65 |
| PLVAP         | 0.6436 | 3.53E-65 |
| APBA2         | 0.6433 | 4.30E-65 |
| RP11-426C22.5 | 0.6431 | 4.79E-65 |
| AP000892.6    | 0.6429 | 5.41E-65 |
| SERPINH1      | 0.6427 | 6.13E-65 |
| FGFR1         | 0.6426 | 6.25E-65 |
| FERMT2        | 0.6425 | 6.95E-65 |
| MSRB3         | 0.6424 | 7.03E-65 |
| PDGFRA        | 0.6421 | 8.42E-65 |
| RUNX1T1       | 0.6416 | 1.18E-64 |
| ENPEP         | 0.6415 | 1.21E-64 |
| MAP1A         | 0.6412 | 1.50E-64 |
| ZEB1          | 0.6405 | 2.22E-64 |
| ZNF423        | 0.6396 | 3.89E-64 |
| SGCD          | 0.6391 | 5.09E-64 |
| SHANK1        | 0.6369 | 1.88E-63 |

|               |        |          |
|---------------|--------|----------|
| PODN          | 0.6367 | 2.09E-63 |
| GLIS3         | 0.6366 | 2.16E-63 |
| FYN           | 0.6358 | 3.57E-63 |
| CTGF          | 0.6357 | 3.78E-63 |
| TCF4          | 0.6329 | 1.94E-62 |
| CREB3L1       | 0.6314 | 4.54E-62 |
| FBXL7         | 0.6310 | 5.79E-62 |
| EDNRA         | 0.6304 | 7.94E-62 |
| PCDH18        | 0.6297 | 1.20E-61 |
| SEPT4         | 0.6286 | 2.26E-61 |
| SYT11         | 0.6285 | 2.40E-61 |
| SH3RF3        | 0.6277 | 3.78E-61 |
| ARHGEF17      | 0.6275 | 4.02E-61 |
| CASC15        | 0.6274 | 4.33E-61 |
| C3orf80       | 0.6269 | 5.89E-61 |
| PLXNC1        | 0.6260 | 9.73E-61 |
| DAAM2         | 0.6253 | 1.42E-60 |
| TIE1          | 0.6242 | 2.60E-60 |
| TNS3          | 0.6241 | 2.81E-60 |
| GLIS2         | 0.6238 | 3.29E-60 |
| LRCH2         | 0.6238 | 3.35E-60 |
| DLL4          | 0.6226 | 6.26E-60 |
| MFAP2         | 0.6216 | 1.11E-59 |
| DOK6          | 0.6213 | 1.33E-59 |
| FOXS1         | 0.6196 | 3.35E-59 |
| SNAI1         | 0.6192 | 4.21E-59 |
| GPR173        | 0.6186 | 5.91E-59 |
| TMEM26        | 0.6186 | 5.93E-59 |
| CNN1          | 0.6185 | 6.13E-59 |
| RP11-576I22.2 | 0.6171 | 1.30E-58 |
| GUCY1B3       | 0.6170 | 1.37E-58 |
| ARSB          | 0.6155 | 3.09E-58 |
| WIPF1         | 0.6154 | 3.28E-58 |
| VASH1         | 0.6152 | 3.61E-58 |
| LINC01561     | 0.6151 | 3.98E-58 |
| HMCN1         | 0.6144 | 5.65E-58 |
| VGLL3         | 0.6132 | 1.09E-57 |
| CPQ           | 0.6128 | 1.36E-57 |
| NOVA2         | 0.6123 | 1.73E-57 |
| ARHGEF40      | 0.6118 | 2.24E-57 |



|          |        |          |
|----------|--------|----------|
| MICAL2   | 0.6112 | 3.16E-57 |
| CLSTN2   | 0.6109 | 3.60E-57 |
| FGD5     | 0.6107 | 4.04E-57 |
| LAMA2    | 0.6100 | 5.92E-57 |
| ITGBL1   | 0.6099 | 6.36E-57 |
| GLIS1    | 0.6097 | 7.11E-57 |
| COL8A2   | 0.6096 | 7.21E-57 |
| COL15A1  | 0.6078 | 1.91E-56 |
| RASA3    | 0.6067 | 3.42E-56 |
| ARHGEF25 | 0.6065 | 3.66E-56 |
| SPON2    | 0.6065 | 3.76E-56 |
| CCDC102B | 0.6063 | 4.12E-56 |
| C1QTNF1  | 0.6059 | 5.16E-56 |
| PCDH17   | 0.6055 | 6.23E-56 |
| LAMB2    | 0.6044 | 1.11E-55 |
| DSEL     | 0.6041 | 1.28E-55 |
| SEMA6B   | 0.6034 | 1.90E-55 |
| CORIN    | 0.6023 | 3.28E-55 |
| DGKI     | 0.6022 | 3.53E-55 |
| MME      | 0.6004 | 9.03E-55 |
| SLC24A2  | 0.6001 | 1.04E-54 |
| IGDCC4   | 0.5991 | 1.69E-54 |
| DIRC1    | 0.5988 | 1.98E-54 |
| FBLN7    | 0.5982 | 2.72E-54 |
| RECK     | 0.5975 | 3.96E-54 |
| GXYLT2   | 0.5974 | 4.14E-54 |
| SPOCK1   | 0.5971 | 4.86E-54 |
| AXL      | 0.5967 | 5.82E-54 |
| RHOJ     | 0.5956 | 1.00E-53 |
| ADAMTS16 | 0.5952 | 1.22E-53 |
| RPLP0P2  | 0.5946 | 1.68E-53 |
| ANXA6    | 0.5942 | 2.04E-53 |
| CCDC80   | 0.5939 | 2.34E-53 |
| RBPMS2   | 0.5936 | 2.78E-53 |
| PPEF1    | 0.5931 | 3.57E-53 |
| TMEM200A | 0.5930 | 3.73E-53 |
| A2M      | 0.5909 | 1.07E-52 |
| ITGA5    | 0.5908 | 1.14E-52 |
| MMP9     | 0.5907 | 1.16E-52 |
| CD93     | 0.5904 | 1.34E-52 |

|             |        |          |
|-------------|--------|----------|
| DCLK2       | 0.5892 | 2.46E-52 |
| ST8SIA2     | 0.5889 | 2.83E-52 |
| FILIP1L     | 0.5889 | 2.87E-52 |
| MAGI2-AS3   | 0.5881 | 4.26E-52 |
| CNPY4       | 0.5875 | 5.65E-52 |
| GRID1       | 0.5873 | 6.13E-52 |
| IGFBP4      | 0.5872 | 6.63E-52 |
| RHOBTB1     | 0.5867 | 8.29E-52 |
| NNMT        | 0.5862 | 1.09E-51 |
| STK32B      | 0.5860 | 1.20E-51 |
| PRKG1       | 0.5852 | 1.75E-51 |
| CYGB        | 0.5849 | 2.03E-51 |
| FZD2        | 0.5843 | 2.74E-51 |
| GPR116      | 0.5834 | 4.18E-51 |
| TTYH3       | 0.5831 | 4.89E-51 |
| TNN         | 0.5819 | 8.40E-51 |
| CALU        | 0.5819 | 8.46E-51 |
| C1S         | 0.5811 | 1.26E-50 |
| MATN3       | 0.5811 | 1.27E-50 |
| TBX2        | 0.5802 | 1.90E-50 |
| KCND2       | 0.5801 | 2.00E-50 |
| MSC         | 0.5799 | 2.27E-50 |
| RP5-952N6.1 | 0.5795 | 2.65E-50 |
| TUBA1A      | 0.5792 | 3.12E-50 |
| SLC41A2     | 0.5792 | 3.15E-50 |
| PTK7        | 0.5791 | 3.23E-50 |
| S1PR2       | 0.5783 | 4.84E-50 |
| MRAS        | 0.5774 | 7.14E-50 |
| LAMC1       | 0.5773 | 7.58E-50 |
| AC093850.2  | 0.5768 | 9.84E-50 |
| ENTPD1      | 0.5764 | 1.19E-49 |
| TMEM47      | 0.5762 | 1.31E-49 |
| PTPRN       | 0.5760 | 1.43E-49 |
| TMEM255B    | 0.5747 | 2.60E-49 |
| FLT4        | 0.5732 | 5.14E-49 |
| APLNR       | 0.5724 | 7.49E-49 |
| ADAMTS6     | 0.5723 | 8.08E-49 |
| CLMP        | 0.5716 | 1.11E-48 |
| ACAN        | 0.5715 | 1.16E-48 |
| ATP8B2      | 0.5702 | 2.07E-48 |

|               |        |          |
|---------------|--------|----------|
| PDGFB         | 0.5700 | 2.32E-48 |
| KDELR3        | 0.5693 | 3.24E-48 |
| TSHZ3         | 0.5692 | 3.32E-48 |
| C11orf96      | 0.5687 | 4.28E-48 |
| SLC2A3        | 0.5682 | 5.36E-48 |
| RP5-907D15.4  | 0.5675 | 7.27E-48 |
| MRVI1         | 0.5672 | 8.32E-48 |
| GSC           | 0.5672 | 8.33E-48 |
| BMP8A         | 0.5670 | 9.21E-48 |
| PTGIR         | 0.5663 | 1.28E-47 |
| F2RL2         | 0.5655 | 1.78E-47 |
| ARSE          | 0.5648 | 2.47E-47 |
| DLG4          | 0.5646 | 2.73E-47 |
| EDIL3         | 0.5644 | 3.05E-47 |
| MAGEH1        | 0.5635 | 4.58E-47 |
| RP5-1059L7.1  | 0.5634 | 4.62E-47 |
| RASL12        | 0.5631 | 5.35E-47 |
| SERPING1      | 0.5625 | 6.98E-47 |
| TMEM130       | 0.5619 | 9.23E-47 |
| ELTD1         | 0.5618 | 9.51E-47 |
| PTPRM         | 0.5616 | 1.07E-46 |
| BCL6B         | 0.5611 | 1.31E-46 |
| C1R           | 0.5604 | 1.83E-46 |
| ADAMTSL1      | 0.5602 | 1.99E-46 |
| AKAP12        | 0.5601 | 2.06E-46 |
| MARVELD1      | 0.5594 | 2.82E-46 |
| NPR2          | 0.5585 | 4.11E-46 |
| AC004538.3    | 0.5575 | 6.58E-46 |
| RUNX2         | 0.5572 | 7.40E-46 |
| TNFSF4        | 0.5571 | 7.75E-46 |
| LDB2          | 0.5568 | 8.84E-46 |
| TSPAN11       | 0.5559 | 1.34E-45 |
| CDH6          | 0.5558 | 1.38E-45 |
| RNF144A-AS1   | 0.5555 | 1.55E-45 |
| COMP          | 0.5554 | 1.67E-45 |
| SH3PXD2B      | 0.5547 | 2.21E-45 |
| PIEZO2        | 0.5534 | 3.98E-45 |
| BMP1          | 0.5531 | 4.57E-45 |
| RP11-513O13.1 | 0.5527 | 5.39E-45 |
| GPR162        | 0.5526 | 5.69E-45 |

|              |        |          |
|--------------|--------|----------|
| CALHM2       | 0.5521 | 6.91E-45 |
| ARMC9        | 0.5519 | 7.55E-45 |
| ITGB5        | 0.5517 | 8.41E-45 |
| LINC00922    | 0.5515 | 8.88E-45 |
| PNMA2        | 0.5505 | 1.38E-44 |
| SCG2         | 0.5502 | 1.57E-44 |
| ALPK2        | 0.5499 | 1.83E-44 |
| IGF2-AS      | 0.5492 | 2.45E-44 |
| NKX3-2       | 0.5491 | 2.56E-44 |
| GRIA3        | 0.5486 | 3.15E-44 |
| PEAK1        | 0.5481 | 3.83E-44 |
| MIR143HG     | 0.5480 | 4.10E-44 |
| F13A1        | 0.5480 | 4.14E-44 |
| RP11-417E7.2 | 0.5479 | 4.31E-44 |
| HEG1         | 0.5474 | 5.22E-44 |
| NKD1         | 0.5470 | 6.28E-44 |
| TENM3        | 0.5469 | 6.58E-44 |
| ZFP92        | 0.5465 | 7.75E-44 |
| NUAK1        | 0.5460 | 9.35E-44 |
| CSGALNACT2   | 0.5456 | 1.14E-43 |
| ABCC9        | 0.5456 | 1.14E-43 |
| FAM101B      | 0.5446 | 1.70E-43 |
| INHBA        | 0.5445 | 1.76E-43 |
| ACE          | 0.5445 | 1.80E-43 |
| AP001471.1   | 0.5444 | 1.85E-43 |
| LRP1         | 0.5441 | 2.17E-43 |
| RP11-13P5.2  | 0.5425 | 4.19E-43 |
| NAP1L3       | 0.5423 | 4.55E-43 |
| KANK2        | 0.5414 | 6.74E-43 |
| ST6GALNAC5   | 0.5413 | 6.89E-43 |
| ENOX1        | 0.5411 | 7.67E-43 |
| FZD1         | 0.5409 | 8.18E-43 |
| AC007750.5   | 0.5403 | 1.06E-42 |
| FLT1         | 0.5400 | 1.17E-42 |
| EVC          | 0.5395 | 1.48E-42 |
| CTD-3247H4.2 | 0.5393 | 1.56E-42 |
| EPDR1        | 0.5390 | 1.82E-42 |
| LHFPL2       | 0.5389 | 1.91E-42 |
| CD276        | 0.5384 | 2.36E-42 |
| LPAR4        | 0.5378 | 2.94E-42 |

|           |        |          |
|-----------|--------|----------|
| GFPT2     | 0.5377 | 3.07E-42 |
| LSAMP     | 0.5373 | 3.70E-42 |
| CTSZ      | 0.5372 | 3.76E-42 |
| JAM2      | 0.5360 | 6.23E-42 |
| GALNT10   | 0.5359 | 6.55E-42 |
| FAM225B   | 0.5358 | 6.80E-42 |
| MSR1      | 0.5356 | 7.35E-42 |
| NRP1      | 0.5355 | 7.69E-42 |
| GJC1      | 0.5333 | 1.91E-41 |
| STARD8    | 0.5331 | 2.03E-41 |
| CDH2      | 0.5330 | 2.12E-41 |
| AKT3      | 0.5330 | 2.14E-41 |
| PRICKLE1  | 0.5330 | 2.15E-41 |
| SCARF1    | 0.5328 | 2.31E-41 |
| OMD       | 0.5326 | 2.46E-41 |
| LINC01048 | 0.5325 | 2.61E-41 |
| KIRREL    | 0.5323 | 2.87E-41 |
| NRXN2     | 0.5317 | 3.53E-41 |
| TRPV2     | 0.5312 | 4.35E-41 |
| AGTR1     | 0.5310 | 4.71E-41 |
| RGS16     | 0.5310 | 4.79E-41 |
| PLBD2     | 0.5309 | 4.92E-41 |
| PTGDR     | 0.5309 | 4.94E-41 |
| PDE1B     | 0.5306 | 5.56E-41 |
| MMP13     | 0.5305 | 5.90E-41 |
| TIMP1     | 0.5304 | 6.17E-41 |
| EPHA3     | 0.5303 | 6.42E-41 |
| AMPD2     | 0.5302 | 6.71E-41 |
| LIN7A     | 0.5296 | 8.25E-41 |
| ESAM      | 0.5286 | 1.24E-40 |
| CXorf36   | 0.5284 | 1.39E-40 |
| COL16A1   | 0.5279 | 1.64E-40 |
| FAM155A   | 0.5278 | 1.72E-40 |
| TRO       | 0.5277 | 1.78E-40 |
| LINC00654 | 0.5276 | 1.84E-40 |
| BST1      | 0.5272 | 2.21E-40 |
| IFFO1     | 0.5272 | 2.21E-40 |
| PPFIA2    | 0.5268 | 2.61E-40 |
| LDLRAD4   | 0.5265 | 2.88E-40 |
| LINGO1    | 0.5264 | 3.04E-40 |

|               |        |          |
|---------------|--------|----------|
| C16orf45      | 0.5263 | 3.13E-40 |
| MFGE8         | 0.5259 | 3.72E-40 |
| C5AR1         | 0.5256 | 4.08E-40 |
| KANK4         | 0.5251 | 5.04E-40 |
| APBB2         | 0.5251 | 5.08E-40 |
| FBLN1         | 0.5248 | 5.74E-40 |
| RP11-554A11.4 | 0.5245 | 6.54E-40 |
| CDH5          | 0.5242 | 7.17E-40 |
| RCAN2         | 0.5241 | 7.51E-40 |
| GPX7          | 0.5237 | 8.72E-40 |
| NOTCH4        | 0.5231 | 1.11E-39 |
| RP11-175K6.2  | 0.5231 | 1.12E-39 |
| PKIG          | 0.5227 | 1.29E-39 |
| ROR2          | 0.5225 | 1.39E-39 |
| SUSD2         | 0.5225 | 1.43E-39 |
| C14orf37      | 0.5222 | 1.58E-39 |
| SPOCD1        | 0.5220 | 1.74E-39 |
| RFX8          | 0.5215 | 2.12E-39 |
| MCAM          | 0.5213 | 2.28E-39 |
| CCIN          | 0.5213 | 2.30E-39 |
| EVA1B         | 0.5211 | 2.44E-39 |
| S1PR3         | 0.5209 | 2.64E-39 |
| FKBP9         | 0.5206 | 3.03E-39 |

---
